# Supplementary material for: Metformin Directly Binds to MMP-9 to Improve Plaque Stability
Source: MDPI journal article supplement (doi:10.3390/jcdd10020054), 2023-01-30
Supplement: s1 [file s1]

# Supplementary file for

## Metformin directly binds to MMP-9 to improve plaque stability

This file includes:

Supplementary figures S1 to S5

Supplementary figures and supplementary figure legends

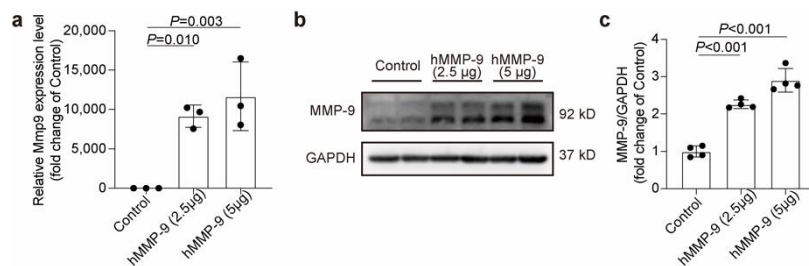

**Figure S1. MMP-9 was successfully overexpressed in HEK293A cells.**

(a) Quantitative polymerase chain reaction (QPCR) for *Mmp9* mRNA expression level of plasmid-transfected HEK293A cells.  $n=3$ ; One-way ANOVA, Dunnett post hoc. Scatter plots show fold change of *Mmp9* gene expression level normalized to the Control group average. (b) Western blot showing the level of MMP-9 in plasmid-transfected HEK293A cells. (c) Quantification of band densities of Western blot.  $n=4$ ; One-way ANOVA, Dunnett post hoc. Scatter plots show fold change of MMP-9 protein expression level normalized to the Control group average.

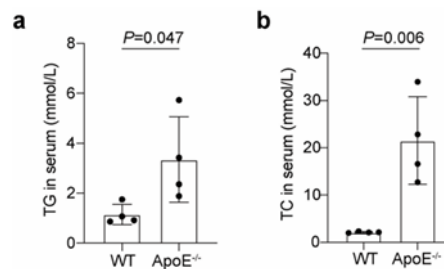

**Figure S2. Serum triglyceride and total cholesterol levels increased in animal models.**

(a) Triglyceride content in the serum of ApoE knockout and wild-type mice. Scatter plots show the concentration of triglyceride in serum. (b) Serum total cholesterol in ApoE knockout mice and wild-type mice. Unpaired Student's *t*-test,  $n=4$ . Scatter plots show the concentration of total cholesterol in serum.

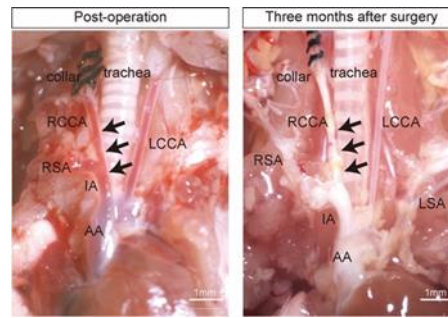

**Figure S3. The carotid plaque model was successfully constructed.** Anatomical diagram of the neck vessels of the post-operative model mice (left panel), showing smooth and transparent right common carotid artery (black arrow); Anatomical diagram of neck vessels in model mice 3 months after surgery (right panel). Diffuse, porcelain white continuous plaque formation can be seen throughout the right common carotid artery (black arrow), scale bar: 1mm. *RCCA* right carotid common artery, *LCCA* left carotid common artery, *RSA* right subclavian artery, *IA* innominate artery, *AA* ascending aorta.

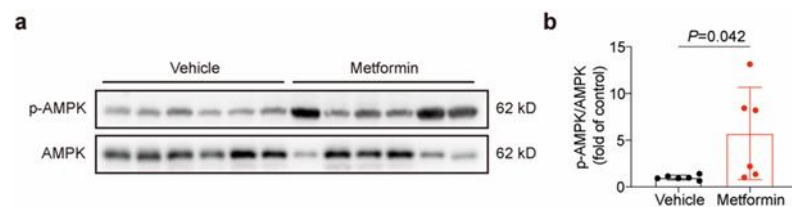

**Figure S4. Metformin successfully activated AMPK.** (a) Western blot showing the level of p-AMPK in plaque model mice livers after consecutive 14-day metformin treatment (200 mg·kg<sup>-1</sup>) by intragastric gavage. Total AMPK was used as a loading control. (b) Quantification of band densities of Western blot. Unpaired Student's t-test, *n* = 6 per group. *AMPK* AMP-activated protein. Scatter plots show the relative phosphorylation level of AMPK normalized to the Vehicle group average.

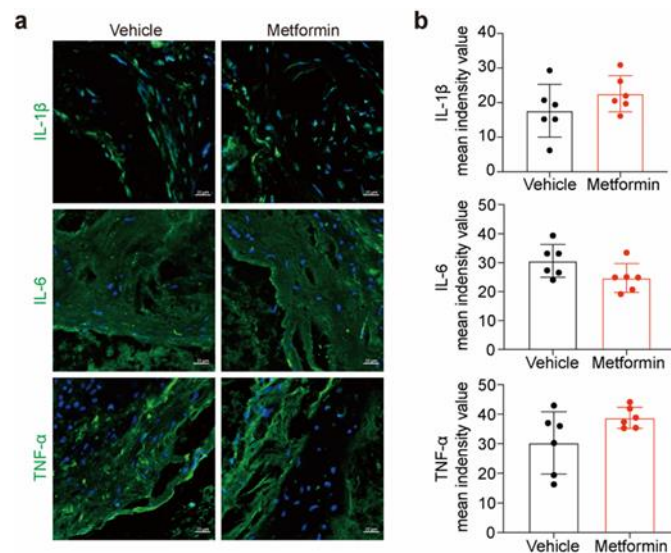

**Figure S5. Metformin treatment had no significant anti-inflammatory effect in our model.** (a,b) Representative images and quantification of immunofluorescence staining for inflammatory cytokines IL-1β, IL-6, and TNF-α in plaques. Scale bars represent 20 μm. Unpaired Student's

t-test, n = 6 per group. Scatter plots show the mean intensity values of the inflammatory cytokines IL-1 $\beta$ , IL-6, and TNF- $\alpha$  in plaques.
